## Correction

# Correction: Transovarial Transmission of a Plant Virus Is Mediated by Vitellogenin of Its Insect Vector

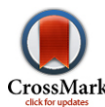

The *PLOS Pathogens* Staff

## Notice of Republication

This article was republished on April 3, 2014, to correct affiliations for all authors and correct legends for Figures 4B and 4C. Please download this article again to view the correct version. The originally published, uncorrected article and the republished, corrected article are provided here for reference.

## Supporting Information

**File S1.** Originally published, uncorrected article.  
(PDF)

**File S2.** Republished, corrected article.  
(PDF)

## Reference

1. Huo Y, Liu W, Zhang F, Chen X, Li L, et al. (2014) Transovarial Transmission of a Plant Virus Is Mediated by Vitellogenin of Its Insect Vector. *PLoS Pathog* 10(3): e1003949. doi:10.1371/journal.ppat.1003949

**Citation:** The *PLOS Pathogens* Staff (2014) Correction: Transovarial Transmission of a Plant Virus Is Mediated by Vitellogenin of Its Insect Vector. *PLoS Pathog* 10(4): e1004141. doi:10.1371/journal.ppat.1004141

**Published** April 25, 2014

**Copyright:** © 2014 The *PLOS Pathogens* Staff. This is an open-access article distributed under the terms of the Creative Commons Attribution License, which permits unrestricted use, distribution, and reproduction in any medium, provided the original author and source are credited.
